# Supplementary material
Source: PubMed Central journal article supplement (PMC1173147)
Supplement: 7600706s1.pdf [file 7600706s1.pdf]

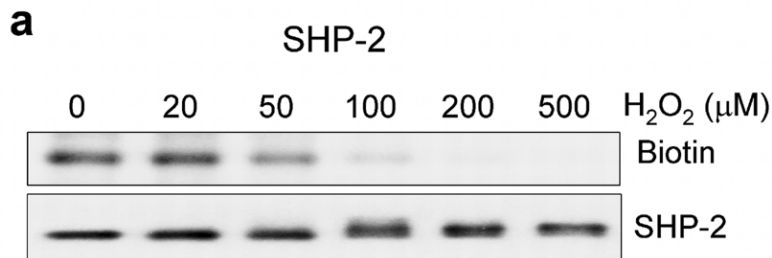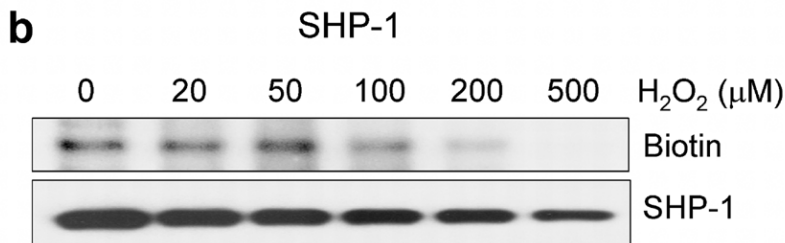

**Supplementary Figure 1.** Oxidation of SHP-2 and SHP-1 by exogenous hydrogen peroxide. Jurkat T cells were exposed to graded concentrations of hydrogen peroxide for 5 min. Lysis and labeling with PEO-iodoacetyl biotin was performed as in Figure 1 and as described in the Methods. SHP-2 (**a**) or SHP-1 (**b**) was immunoprecipitated and the biotinylation of phosphatases was detected by blot with HRP-conjugated streptavidin and ECL. Application of protein was confirmed by immunoblot analysis.
