# Supplementary material
Source: PubMed Central journal article supplement (PMC1173147)
Supplement: 7600706s3.pdf [file 7600706s3.pdf]

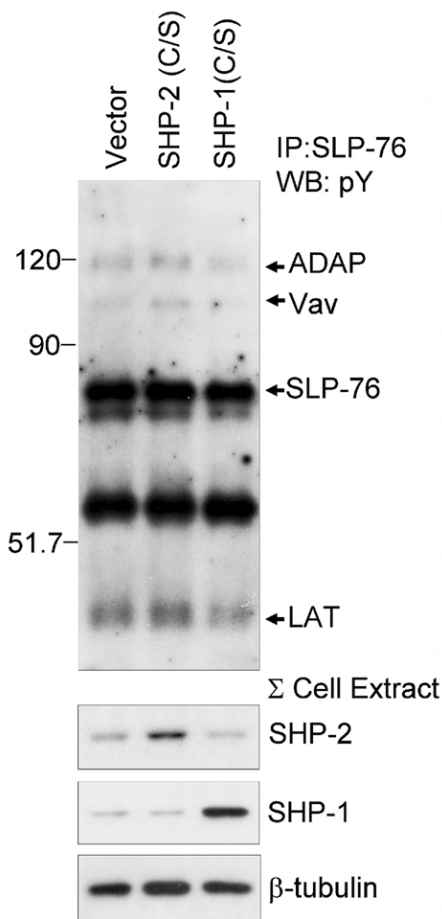

**Supplementary Figure 3.** Effect of SHP-2(C/S) or SHP-1(C/S) expression on phosphorylation and association of signaling molecules with SLP-76. Jurkat T cells were transiently transfected with an empty vector (Vector) or an expression vector encoding SHP-2(C/S) or SHP-1(C/S). Cells were stimulated for 5 min by anti-CD3 crosslinking. Postnuclear cell lysates were pre-cleared on protein G, and then immunoprecipitated with anti-SLP-76 antibody. Immunoprecipitates were separated by SDS/PAGE and immunoblotted for phosphotyrosine. Total lysates were probed for SHP-2 and SHP-1 to measure expression levels and  $\beta$ -tubulin was probed to control loading.
