# Supplementary material
Source: PubMed Central journal article supplement (PMC1173147)
Supplement: 7600706s4.pdf [file 7600706s4.pdf]

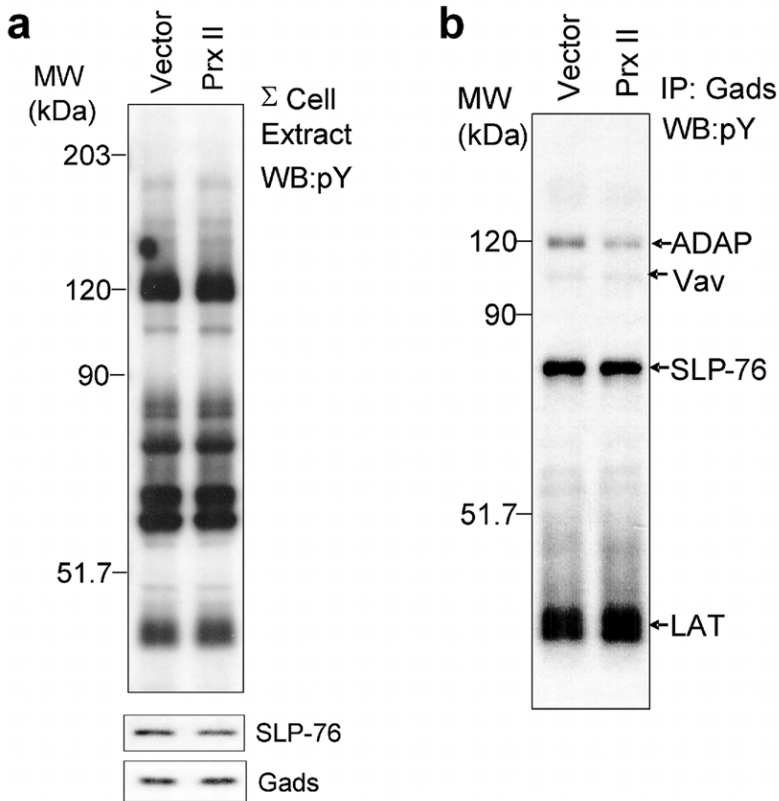

**Supplementary Figure 4.** Effect of peroxiredoxin II (Prx II) overexpression on association of signaling molecules with Gads and SLP-76. Jurkat T cells were transfected with an empty Vector or an expression vector encoding PrxII and cells were stimulated by anti-CD3 crosslinking as in Figure 3. **(a)** Total cell lysates were blotted with anti-phosphotyrosine antibody and the membrane was stripped and re-probed with antibodies to Gads and SLP-76 to control loading. **(b)** Lysates were immunoprecipitated with anti-Gads, were separated by SDS-PAGE and were immunoblotted for phosphotyrosine.
